# Supplementary material for: Plasmid carriage can limit bacteria–phage coevolution
Source: PubMed Central journal article supplement (PMC4571675; doi:10.1098/rsbl.2015.0361), 2015-08

Growth rate (OD600/hr)

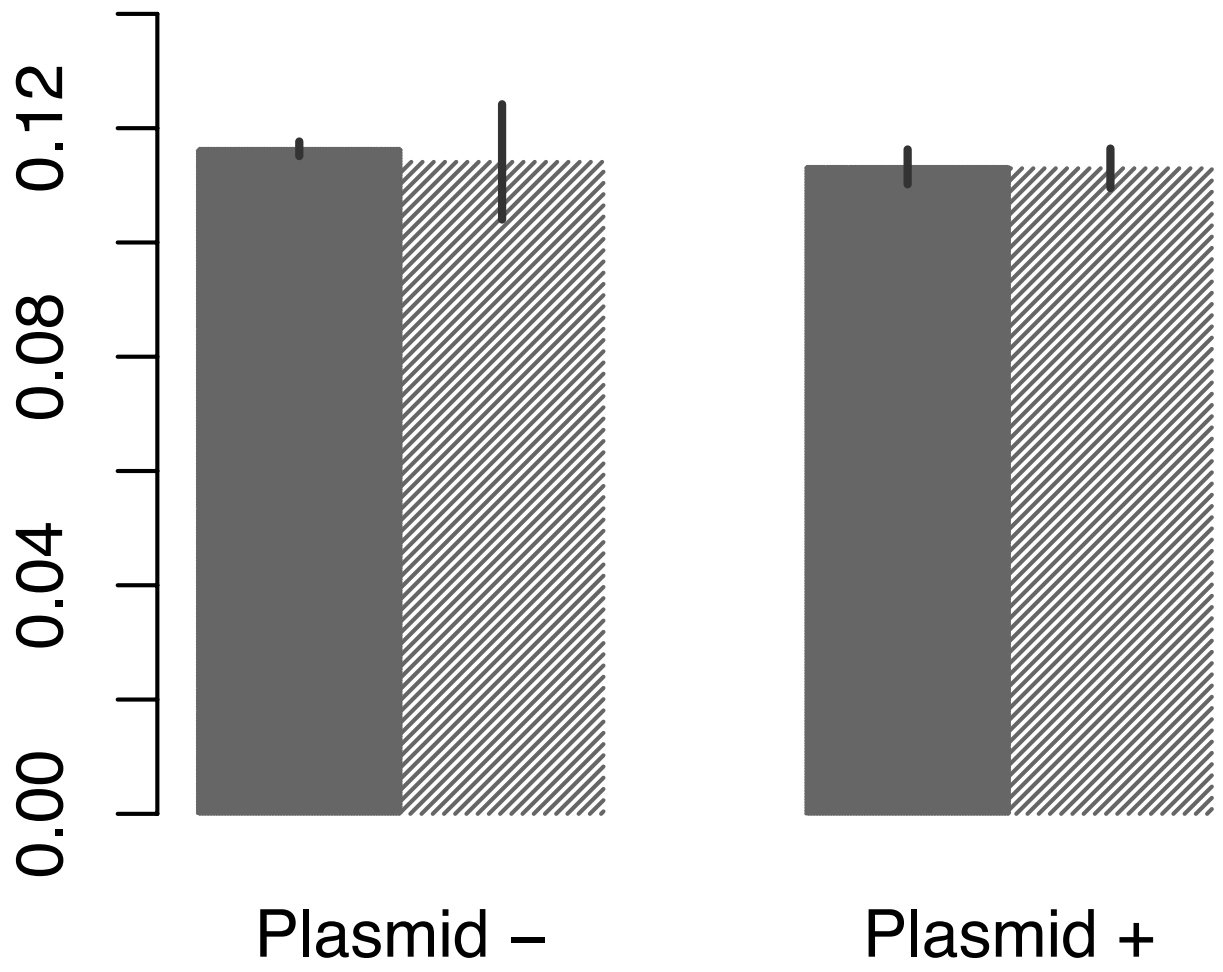

Supplement: rsbl20150361supp1.pdf [file rsbl20150361supp1.pdf]
